# Supplementary material for: Screening of selective histone deacetylase inhibitors by proteochemometric modeling
Source: Springer Nature journal article supplement (doi:10.1186/1471-2105-13-212), 2012-08-22
Supplement: 12859_2012_5563_MOESM1_ESM.pdf [file 12859_2012_5563_MOESM1_ESM.pdf]

**Table S1. Train set**

| HDAC  | Ligand | pIC50( $\mu$ M) | HDAC  | Ligand | pIC50( $\mu$ M) |
|-------|--------|-----------------|-------|--------|-----------------|
| HDAC2 | 1      | -2.607          | HDAC6 | 294    | 1.104262        |
| HDAC2 | 2      | -2.81877        | HDAC6 | 295    | 1.259507        |
| HDAC2 | 4      | 1.385853        | HDAC6 | 297    | 0.934925        |
| HDAC2 | 5      | -1.10396        | HDAC6 | 298    | 1.01397         |
| HDAC2 | 6      | -1.04027        | HDAC6 | 300    | 0.853057        |
| HDAC2 | 9      | -0.47415        | HDAC6 | 302    | -0.11548        |
| HDAC2 | 13     | 1.542366        | HDAC6 | 322    | -1.75758        |
| HDAC2 | 16     | -1.33109        | HDAC6 | 323    | -1.75758        |
| HDAC2 | 18     | -1.33109        | HDAC6 | 324    | -1.75758        |
| HDAC2 | 19     | -1.33109        | HDAC6 | 326    | -1.75758        |
| HDAC2 | 20     | -1.33109        | HDAC6 | 327    | -1.75758        |
| HDAC2 | 21     | -1.33109        | HDAC6 | 328    | -1.75758        |
| HDAC2 | 22     | -1.39764        | HDAC6 | 329    | -1.75758        |
| HDAC2 | 23     | -1.33109        | HDAC6 | 331    | -1.75758        |
| HDAC2 | 25     | -0.8343         | HDAC6 | 332    | -1.75758        |
| HDAC2 | 26     | -1.16742        | HDAC6 | 333    | -1.75758        |
| HDAC2 | 27     | -1.33109        | HDAC6 | 335    | -1.68315        |
| HDAC2 | 29     | -0.78714        | HDAC6 | 336    | -1.63775        |
| HDAC2 | 31     | -0.31215        | HDAC6 | 338    | -1.51487        |
| HDAC2 | 32     | -0.36102        | HDAC6 | 339    | -1.51204        |
| HDAC2 | 35     | -0.14355        | HDAC6 | 341    | -1.35395        |
| HDAC2 | 36     | 0.000079        | HDAC6 | 342    | -1.3495         |
| HDAC2 | 38     | 0.172695        | HDAC6 | 343    | -1.20305        |
| HDAC2 | 40     | 0.010869        | HDAC6 | 344    | -1.13197        |
| HDAC2 | 42     | 0.027969        | HDAC6 | 346    | -1.06364        |
| HDAC2 | 43     | -0.14355        | HDAC6 | 347    | -1.01526        |
| HDAC2 | 44     | 0.588367        | HDAC6 | 349    | -0.94192        |
| HDAC2 | 47     | 0.361983        | HDAC6 | 350    | -0.94192        |
| HDAC2 | 48     | 0.562687        | HDAC6 | 351    | -0.94192        |
| HDAC2 | 51     | 0.613188        | HDAC6 | 352    | -0.94192        |
| HDAC2 | 52     | 0.886033        | HDAC6 | 353    | -0.94192        |
| HDAC2 | 55     | 0.531864        | HDAC6 | 355    | -0.94192        |
| HDAC2 | 56     | 0.552914        | HDAC6 | 356    | -0.94192        |
| HDAC2 | 57     | 0.435104        | HDAC6 | 357    | -0.94192        |
| HDAC2 | 58     | 0.953095        | HDAC6 | 358    | -0.94192        |
| HDAC2 | 59     | 0.780137        | HDAC6 | 359    | -0.94192        |
| HDAC2 | 61     | 0.507728        | HDAC6 | 364    | -0.81048        |
| HDAC2 | 62     | 0.382231        | HDAC6 | 367    | -0.69639        |
| HDAC2 | 63     | 0.848032        | HDAC6 | 369    | -0.68923        |
| HDAC2 | 64     | 1.423176        | HDAC6 | 370    | -0.68923        |
| HDAC2 | 65     | 0.507728        | HDAC6 | 371    | -0.66453        |

---

|       |     |          |       |     |          |
|-------|-----|----------|-------|-----|----------|
| HDAC2 | 66  | 0.649243 | HDAC6 | 372 | -0.63463 |
| HDAC2 | 67  | 0.988351 | HDAC6 | 373 | -0.63463 |
| HDAC2 | 68  | 0.613188 | HDAC6 | 374 | -0.62609 |
| HDAC2 | 69  | 0.890379 | HDAC6 | 375 | -0.60472 |
| HDAC2 | 70  | 0.947913 | HDAC6 | 376 | -0.58973 |
| HDAC2 | 71  | 0.636812 | HDAC6 | 377 | -0.57407 |
| HDAC2 | 73  | 0.845271 | HDAC6 | 378 | -0.57004 |
| HDAC2 | 75  | 1.186175 | HDAC6 | 379 | -0.55134 |
| HDAC2 | 76  | 1.1467   | HDAC6 | 380 | -0.52705 |
| HDAC2 | 77  | 1.179047 | HDAC6 | 381 | -0.51544 |
| HDAC2 | 78  | 1.142856 | HDAC6 | 384 | -0.45085 |
| HDAC2 | 81  | 1.919917 | HDAC6 | 385 | -0.44369 |
| HDAC2 | 82  | 1.931533 | HDAC6 | 386 | -0.42438 |
| HDAC2 | 83  | 1.996118 | HDAC6 | 387 | -0.39411 |
| HDAC2 | 85  | -1.75758 | HDAC6 | 388 | -0.37882 |
| HDAC2 | 86  | -1.75758 | HDAC6 | 389 | -0.37181 |
| HDAC2 | 87  | -1.75758 | HDAC6 | 390 | -0.37181 |
| HDAC2 | 89  | -1.75402 | HDAC6 | 392 | -0.35364 |
| HDAC2 | 91  | -0.58002 | HDAC6 | 396 | -0.31424 |
| HDAC2 | 92  | -0.79473 | HDAC6 | 399 | -0.2699  |
| HDAC2 | 94  | 1.412105 | HDAC6 | 400 | -0.25789 |
| HDAC2 | 104 | -0.06026 | HDAC6 | 401 | -0.24546 |
| HDAC2 | 106 | 0.805755 | HDAC6 | 403 | -0.23258 |
| HDAC2 | 108 | 1.259507 | HDAC6 | 404 | -0.21921 |
| HDAC2 | 109 | 0.443851 | HDAC6 | 406 | -0.20531 |
| HDAC2 | 111 | -0.37181 | HDAC6 | 411 | -0.16003 |
| HDAC2 | 114 | 0.443851 | HDAC6 | 412 | -0.16003 |
| HDAC2 | 120 | 0.570198 | HDAC6 | 413 | -0.1568  |
| HDAC2 | 121 | 1.296829 | HDAC6 | 415 | -0.12627 |
| HDAC2 | 123 | 0.285194 | HDAC6 | 416 | -0.12271 |
| HDAC2 | 124 | -0.08099 | HDAC6 | 418 | -0.10548 |
| HDAC2 | 126 | -1.44175 | HDAC6 | 419 | -0.08895 |
| HDAC2 | 144 | 0.522896 | HDAC6 | 421 | -0.08499 |
| HDAC2 | 155 | -0.97569 | HDAC6 | 423 | -0.08299 |
| HDAC2 | 170 | 0.501421 | HDAC6 | 425 | -0.07284 |
| HDAC2 | 177 | -0.73272 | HDAC6 | 429 | -0.06026 |
| HDAC2 | 194 | -0.33645 | HDAC6 | 432 | -0.04277 |
| HDAC2 | 195 | -0.26514 | HDAC6 | 433 | -0.02905 |
| HDAC2 | 197 | -0.26514 | HDAC6 | 437 | -0.00495 |
| HDAC2 | 205 | 0.337544 | HDAC6 | 438 | -0.00495 |
| HDAC2 | 209 | 0.266459 | HDAC6 | 439 | -0.00445 |
| HDAC2 | 211 | 0.443851 | HDAC6 | 440 | 0.000079 |
| HDAC2 | 212 | -0.07694 | HDAC6 | 441 | 0.010347 |
| HDAC2 | 213 | -0.75502 | HDAC6 | 442 | 0.015595 |

---

---

|       |      |          |       |     |          |
|-------|------|----------|-------|-----|----------|
| HDAC2 | 214  | 0.105376 | HDAC6 | 443 | 0.02633  |
| HDAC2 | 223  | 0.079124 | HDAC6 | 445 | 0.042498 |
| HDAC2 | 228  | 1.562614 | HDAC6 | 446 | 0.05116  |
| HDAC2 | 232  | 0.949385 | HDAC6 | 447 | 0.054684 |
| HDAC2 | 241  | 1.104262 | HDAC6 | 449 | 0.066693 |
| HDAC2 | 243  | 0.148806 | HDAC6 | 450 | 0.066693 |
| HDAC2 | 244  | 1.829625 | HDAC6 | 452 | 0.066693 |
| HDAC2 | 335  | -1.98308 | HDAC6 | 453 | 0.072854 |
| HDAC2 | 337  | -1.72183 | HDAC6 | 454 | 0.079124 |
| HDAC2 | 347  | -1.33109 | HDAC6 | 455 | 0.085507 |
| HDAC2 | 363  | 0.956843 | HDAC6 | 456 | 0.085507 |
| HDAC2 | 382  | -1.11932 | HDAC6 | 457 | 0.098628 |
| HDAC2 | 394  | -1.74422 | HDAC6 | 458 | 0.104695 |
| HDAC2 | 423  | -0.59448 | HDAC6 | 459 | 0.105376 |
| HDAC2 | 452  | -0.95582 | HDAC6 | 460 | 0.105376 |
| HDAC2 | 685  | -0.94192 | HDAC6 | 462 | 0.107425 |
| HDAC2 | 910  | 0.443851 | HDAC6 | 463 | 0.112254 |
| HDAC2 | 1106 | 0.207283 | HDAC6 | 464 | 0.119269 |
| HDAC2 | 1109 | 0.689388 | HDAC6 | 467 | 0.131522 |
| HDAC2 | 1130 | 0.768433 | HDAC6 | 468 | 0.13373  |
| HDAC2 | 1142 | -0.08895 | HDAC6 | 469 | 0.13373  |
| HDAC2 | 1165 | 0.87034  | HDAC6 | 470 | 0.148806 |
| HDAC2 | 1300 | 0.655626 | HDAC6 | 471 | 0.156591 |
| HDAC2 | 1339 | 0.980208 | HDAC6 | 473 | 0.164552 |
| HDAC2 | 1398 | -1.21961 | HDAC6 | 475 | 0.171873 |
| HDAC2 | 1399 | -1.18746 | HDAC6 | 476 | 0.172695 |
| HDAC2 | 1400 | -1.01526 | HDAC6 | 477 | 0.180189 |
| HDAC2 | 1402 | -0.94192 | HDAC6 | 478 | 0.181031 |
| HDAC2 | 1403 | -0.94192 | HDAC6 | 479 | 0.189567 |
| HDAC2 | 1404 | -0.79204 | HDAC6 | 480 | 0.189567 |
| HDAC2 | 1405 | -0.70686 | HDAC6 | 484 | 0.198314 |
| HDAC2 | 1406 | -0.69639 | HDAC6 | 485 | 0.201278 |
| HDAC2 | 1407 | -0.69639 | HDAC6 | 486 | 0.201874 |
| HDAC2 | 1408 | -0.69639 | HDAC6 | 487 | 0.207283 |
| HDAC2 | 1410 | -0.6511  | HDAC6 | 488 | 0.207283 |
| HDAC2 | 1412 | -0.50343 | HDAC6 | 490 | 0.225931 |
| HDAC2 | 1413 | -0.42893 | HDAC6 | 491 | 0.225931 |
| HDAC2 | 1416 | -0.31424 | HDAC6 | 492 | 0.235636 |
| HDAC2 | 1417 | -0.19085 | HDAC6 | 493 | 0.235636 |
| HDAC2 | 1419 | -0.17884 | HDAC6 | 495 | 0.255884 |
| HDAC2 | 1420 | -0.09731 | HDAC6 | 496 | 0.255884 |
| HDAC2 | 1422 | -0.0099  | HDAC6 | 498 | 0.266459 |
| HDAC2 | 1424 | 0.060638 | HDAC6 | 500 | 0.270055 |
| HDAC2 | 1426 | 0.119269 | HDAC6 | 501 | 0.277359 |

---

---

|       |      |          |       |     |          |
|-------|------|----------|-------|-----|----------|
| HDAC2 | 1427 | 0.119269 | HDAC6 | 502 | 0.288606 |
| HDAC2 | 1429 | 0.119269 | HDAC6 | 504 | 0.288606 |
| HDAC2 | 1430 | 0.119269 | HDAC6 | 505 | 0.299042 |
| HDAC2 | 1432 | 0.119269 | HDAC6 | 506 | 0.324661 |
| HDAC2 | 1433 | 0.119269 | HDAC6 | 509 | 0.324661 |
| HDAC2 | 1438 | 0.156591 | HDAC6 | 510 | 0.337544 |
| HDAC2 | 1440 | 0.266459 | HDAC6 | 511 | 0.350912 |
| HDAC2 | 1441 | 0.277359 | HDAC6 | 516 | 0.371962 |
| HDAC2 | 1442 | 0.288606 | HDAC6 | 517 | 0.379266 |
| HDAC2 | 1443 | 0.410089 | HDAC6 | 518 | 0.379266 |
| HDAC4 | 1    | -4.34818 | HDAC6 | 519 | 0.379266 |
| HDAC4 | 2    | -2.66617 | HDAC6 | 520 | 0.38447  |
| HDAC4 | 4    | -1.51204 | HDAC6 | 521 | 0.394343 |
| HDAC4 | 6    | -1.00354 | HDAC6 | 522 | 0.394343 |
| HDAC4 | 9    | -0.37882 | HDAC6 | 524 | 0.406883 |
| HDAC4 | 11   | 0.431665 | HDAC6 | 527 | 0.436836 |
| HDAC4 | 12   | 1.041587 | HDAC6 | 529 | 0.443851 |
| HDAC4 | 13   | 1.780117 | HDAC6 | 531 | 0.452819 |
| HDAC4 | 15   | -2.03688 | HDAC6 | 532 | 0.462021 |
| HDAC4 | 24   | -1.14575 | HDAC6 | 534 | 0.462021 |
| HDAC4 | 36   | 0.300221 | HDAC6 | 535 | 0.462021 |
| HDAC4 | 79   | -0.1852  | HDAC6 | 537 | 0.481173 |
| HDAC4 | 80   | 0.030331 | HDAC6 | 540 | 0.491152 |
| HDAC4 | 82   | 1.804007 | HDAC6 | 541 | 0.491152 |
| HDAC4 | 83   | 1.72994  | HDAC6 | 542 | 0.501421 |
| HDAC4 | 92   | -0.02436 | HDAC6 | 544 | 0.501421 |
| HDAC4 | 94   | -1.51204 | HDAC6 | 545 | 0.501421 |
| HDAC4 | 95   | -1.51204 | HDAC6 | 546 | 0.511996 |
| HDAC4 | 96   | -1.51204 | HDAC6 | 547 | 0.511996 |
| HDAC4 | 101  | -1.51204 | HDAC6 | 548 | 0.522896 |
| HDAC4 | 102  | -0.96423 | HDAC6 | 551 | 0.545758 |
| HDAC4 | 144  | -0.94192 | HDAC6 | 552 | 0.58308  |
| HDAC4 | 220  | -0.52427 | HDAC6 | 555 | 0.624803 |
| HDAC4 | 228  | 0.548742 | HDAC6 | 556 | 0.627768 |
| HDAC4 | 231  | 0.048829 | HDAC6 | 557 | 0.636812 |
| HDAC4 | 232  | 1.03214  | HDAC6 | 558 | 0.655626 |
| HDAC4 | 240  | 0.462021 | HDAC6 | 560 | 0.675494 |
| HDAC4 | 241  | 1.140317 | HDAC6 | 563 | 0.689388 |
| HDAC4 | 304  | -0.94192 | HDAC6 | 564 | 0.711306 |
| HDAC4 | 306  | -0.94192 | HDAC6 | 566 | 0.72671  |
| HDAC4 | 307  | -0.94192 | HDAC6 | 567 | 0.729344 |
| HDAC4 | 308  | -0.65907 | HDAC6 | 568 | 0.730668 |
| HDAC4 | 309  | -0.16003 | HDAC6 | 571 | 0.759686 |
| HDAC4 | 311  | 0.000079 | HDAC6 | 572 | 0.777401 |

---

---

|       |     |          |       |     |          |
|-------|-----|----------|-------|-----|----------|
| HDAC4 | 312 | -0.3555  | HDAC6 | 573 | 0.81071  |
| HDAC4 | 314 | 0.426568 | HDAC6 | 574 | 0.81071  |
| HDAC4 | 321 | -1.79134 | HDAC6 | 576 | 0.815735 |
| HDAC4 | 322 | -1.75758 | HDAC6 | 578 | 0.87034  |
| HDAC4 | 324 | -0.62174 | HDAC6 | 580 | 0.901163 |
| HDAC4 | 345 | -0.38909 | HDAC6 | 583 | 0.980208 |
| HDAC4 | 369 | 1.259507 | HDAC6 | 586 | 1.005223 |
| HDAC4 | 375 | -1.34498 | HDAC6 | 589 | 1.005223 |
| HDAC4 | 376 | 0.31223  | HDAC6 | 590 | 1.022938 |
| HDAC4 | 385 | 0.277359 | HDAC6 | 591 | 1.03214  |
| HDAC4 | 395 | 0.635289 | HDAC6 | 592 | 1.03841  |
| HDAC4 | 398 | -0.34894 | HDAC6 | 593 | 1.041587 |
| HDAC4 | 403 | -0.2699  | HDAC6 | 595 | 1.051292 |
| HDAC4 | 404 | -0.26514 | HDAC6 | 597 | 1.082115 |
| HDAC4 | 422 | 0.867986 | HDAC6 | 598 | 1.093015 |
| HDAC4 | 425 | 0.655626 | HDAC6 | 601 | 1.140317 |
| HDAC4 | 426 | -0.58002 | HDAC6 | 604 | 1.194922 |
| HDAC4 | 427 | 0.815735 | HDAC6 | 607 | 1.296829 |
| HDAC4 | 432 | 1.180461 | HDAC6 | 609 | 1.361414 |
| HDAC4 | 433 | 1.63139  | HDAC6 | 610 | 1.361414 |
| HDAC4 | 434 | 0.696544 | HDAC6 | 612 | 1.440459 |
| HDAC4 | 435 | -0.03368 | HDAC6 | 614 | 1.550327 |
| HDAC4 | 437 | 0.87034  | HDAC6 | 615 | 1.602259 |
| HDAC4 | 439 | 0.23761  | HDAC6 | 617 | 1.843165 |
| HDAC4 | 442 | 0.707558 | HDAC6 | 621 | 2.132733 |
| HDAC4 | 447 | 0.337544 | HDAC7 | 2   | -2.34834 |
| HDAC4 | 453 | 0.060638 | HDAC7 | 5   | -1.39862 |
| HDAC4 | 463 | 0.02633  | HDAC7 | 6   | -1.22602 |
| HDAC4 | 464 | 0.72671  | HDAC7 | 9   | -0.42131 |
| HDAC4 | 470 | 0.221176 | HDAC7 | 11  | 0.682373 |
| HDAC4 | 476 | -0.01479 | HDAC7 | 12  | 0.65242  |
| HDAC4 | 480 | 1.361414 | HDAC7 | 15  | -2.26594 |
| HDAC4 | 485 | 1.115877 | HDAC7 | 64  | 0.22307  |
| HDAC4 | 492 | 0.700178 | HDAC7 | 79  | -0.21729 |
| HDAC4 | 495 | 1.440459 | HDAC7 | 80  | -0.04092 |
| HDAC4 | 497 | 0.181031 | HDAC7 | 81  | 1.795864 |
| HDAC4 | 500 | 1.115877 | HDAC7 | 82  | 1.668713 |
| HDAC4 | 503 | 0.250713 | HDAC7 | 83  | 1.931533 |
| HDAC4 | 504 | 1.209998 | HDAC7 | 92  | 0.207283 |
| HDAC4 | 508 | 1.787903 | HDAC7 | 93  | -1.51204 |
| HDAC4 | 510 | 0.410089 | HDAC7 | 94  | -1.51204 |
| HDAC4 | 517 | 0.610343 | HDAC7 | 95  | -1.51204 |
| HDAC4 | 518 | 1.750581 | HDAC7 | 120 | -1.18746 |
| HDAC4 | 522 | 0.410089 | HDAC7 | 176 | -0.69642 |

---

---

|       |     |          |       |     |          |
|-------|-----|----------|-------|-----|----------|
| HDAC4 | 524 | 1.508604 | HDAC7 | 228 | -0.41195 |
| HDAC4 | 525 | 0.357791 | HDAC7 | 301 | 2.320699 |
| HDAC4 | 532 | 0.324661 | HDAC7 | 305 | -0.94192 |
| HDAC4 | 533 | 0.448307 | HDAC7 | 306 | -0.94192 |
| HDAC4 | 542 | 0.410089 | HDAC7 | 307 | -0.94192 |
| HDAC4 | 543 | 1.361414 | HDAC7 | 308 | -0.68193 |
| HDAC4 | 550 | -0.11548 | HDAC7 | 311 | 0.164552 |
| HDAC4 | 554 | -0.17884 | HDAC7 | 312 | 0.245616 |
| HDAC4 | 555 | 0.066693 | HDAC7 | 314 | 0.655626 |
| HDAC4 | 567 | 0.717005 | HDAC7 | 315 | 0.934925 |
| HDAC4 | 570 | 0.89478  | HDAC8 | 2   | -2.0677  |
| HDAC4 | 571 | -0.63463 | HDAC8 | 3   | -2.46175 |
| HDAC4 | 572 | 0.596449 | HDAC8 | 4   | -1.40538 |
| HDAC4 | 573 | -0.35364 | HDAC8 | 5   | 0.052917 |
| HDAC4 | 574 | 0.815735 | HDAC8 | 6   | 0.60472  |
| HDAC4 | 579 | 2.041401 | HDAC8 | 10  | -0.94192 |
| HDAC4 | 584 | 1.968855 | HDAC8 | 12  | 0.333761 |
| HDAC4 | 592 | -0.13674 | HDAC8 | 13  | 1.153199 |
| HDAC4 | 594 | -0.17268 | HDAC8 | 16  | -1.33109 |
| HDAC4 | 595 | 1.908671 | HDAC8 | 17  | -1.05858 |
| HDAC4 | 597 | 1.180461 | HDAC8 | 24  | -1.09635 |
| HDAC4 | 598 | 1.082115 | HDAC8 | 25  | -0.76799 |
| HDAC4 | 599 | 1.812343 | HDAC8 | 27  | -1.01526 |
| HDAC4 | 603 | 1.829625 | HDAC8 | 28  | -1.17115 |
| HDAC4 | 605 | -0.06451 | HDAC8 | 31  | -0.57805 |
| HDAC4 | 608 | -0.61823 | HDAC8 | 32  | -0.56288 |
| HDAC4 | 609 | 1.194922 | HDAC8 | 33  | -0.58491 |
| HDAC4 | 614 | 2.154208 | HDAC8 | 35  | -0.49477 |
| HDAC4 | 622 | -2.00312 | HDAC8 | 36  | 0.300221 |
| HDAC4 | 624 | -1.65207 | HDAC8 | 40  | -0.61468 |
| HDAC4 | 625 | -1.55883 | HDAC8 | 42  | -0.32247 |
| HDAC4 | 627 | -1.51204 | HDAC8 | 43  | -0.56081 |
| HDAC4 | 629 | -1.50691 | HDAC8 | 44  | -0.55134 |
| HDAC4 | 630 | -1.4914  | HDAC8 | 46  | -0.04589 |
| HDAC4 | 631 | -1.45705 | HDAC8 | 48  | -0.53046 |
| HDAC4 | 633 | -1.0324  | HDAC8 | 49  | -0.01817 |
| HDAC4 | 634 | -0.95067 | HDAC8 | 50  | -0.68923 |
| HDAC4 | 635 | -0.87119 | HDAC8 | 51  | -0.04277 |
| HDAC4 | 636 | -0.84842 | HDAC8 | 52  | -0.37357 |
| HDAC4 | 637 | -0.84002 | HDAC8 | 56  | -0.56576 |
| HDAC4 | 638 | -0.76274 | HDAC8 | 58  | -0.36645 |
| HDAC4 | 639 | -0.68923 | HDAC8 | 59  | 0.084221 |
| HDAC4 | 640 | -0.68851 | HDAC8 | 60  | -1.00651 |
| HDAC4 | 641 | -0.64949 | HDAC8 | 62  | -0.86745 |

---

---

|       |     |          |       |     |          |
|-------|-----|----------|-------|-----|----------|
| HDAC4 | 646 | -0.51544 | HDAC8 | 65  | -0.1051  |
| HDAC4 | 649 | 0.085507 | HDAC8 | 66  | 0.170233 |
| HDAC4 | 650 | 0.092007 | HDAC8 | 67  | -0.37003 |
| HDAC4 | 652 | 0.624803 | HDAC8 | 68  | 0.099297 |
| HDAC4 | 653 | 1.968855 | HDAC8 | 69  | -0.1036  |
| HDAC4 | 654 | 2.747188 | HDAC8 | 70  | -0.48461 |
| HDAC6 | 2   | -0.76097 | HDAC8 | 71  | 0.19304  |
| HDAC6 | 3   | -3.1362  | HDAC8 | 72  | -0.71164 |
| HDAC6 | 4   | -1.51204 | HDAC8 | 73  | 0.164552 |
| HDAC6 | 5   | 0.711306 | HDAC8 | 74  | -0.62522 |
| HDAC6 | 6   | 0.491152 | HDAC8 | 75  | -1.33109 |
| HDAC6 | 8   | 0.296696 | HDAC8 | 76  | -0.18789 |
| HDAC6 | 9   | 0.613188 | HDAC8 | 77  | -0.63293 |
| HDAC6 | 10  | -0.94192 | HDAC8 | 78  | -0.22462 |
| HDAC6 | 11  | 0.403706 | HDAC8 | 81  | -0.39183 |
| HDAC6 | 13  | 0.836578 | HDAC8 | 82  | -0.29709 |
| HDAC6 | 14  | -1.18746 | HDAC8 | 84  | -0.0378  |
| HDAC6 | 15  | -0.46474 | HDAC8 | 85  | -1.75758 |
| HDAC6 | 17  | -0.37357 | HDAC8 | 87  | -1.75758 |
| HDAC6 | 18  | -1.33109 | HDAC8 | 93  | -1.51204 |
| HDAC6 | 21  | 0.043069 | HDAC8 | 94  | -1.51204 |
| HDAC6 | 22  | -0.02905 | HDAC8 | 95  | -1.51204 |
| HDAC6 | 23  | -0.31631 | HDAC8 | 96  | -1.51204 |
| HDAC6 | 24  | -1.35579 | HDAC8 | 97  | -1.51204 |
| HDAC6 | 25  | 0.706441 | HDAC8 | 100 | -1.37197 |
| HDAC6 | 26  | 0.172695 | HDAC8 | 103 | -1.23697 |
| HDAC6 | 27  | 0.416589 | HDAC8 | 104 | -1.23697 |
| HDAC6 | 28  | 0.132257 | HDAC8 | 105 | -1.22122 |
| HDAC6 | 29  | 0.642973 | HDAC8 | 108 | -1.18746 |
| HDAC6 | 30  | 1.831401 | HDAC8 | 110 | -1.18746 |
| HDAC6 | 32  | 0.804773 | HDAC8 | 111 | -1.18746 |
| HDAC6 | 33  | 1.097471 | HDAC8 | 113 | -1.18746 |
| HDAC6 | 34  | 0.92791  | HDAC8 | 114 | -1.18746 |
| HDAC6 | 35  | 1.060261 | HDAC8 | 115 | -1.12401 |
| HDAC6 | 36  | 1.505044 | HDAC8 | 116 | -1.06111 |
| HDAC6 | 40  | 1.765041 | HDAC8 | 117 | -1.01149 |
| HDAC6 | 41  | 0.968333 | HDAC8 | 118 | -0.97729 |
| HDAC6 | 42  | 1.066369 | HDAC8 | 123 | -0.94192 |
| HDAC6 | 43  | 0.682373 | HDAC8 | 126 | -0.93113 |
| HDAC6 | 44  | 0.938485 | HDAC8 | 127 | -0.93113 |
| HDAC6 | 46  | 2.093333 | HDAC8 | 128 | -0.87206 |
| HDAC6 | 49  | 1.812343 | HDAC8 | 129 | -0.83238 |
| HDAC6 | 50  | 1.641138 | HDAC8 | 131 | -0.8176  |
| HDAC6 | 51  | 1.919917 | HDAC8 | 132 | -0.81558 |

---

---

|       |     |          |       |     |          |
|-------|-----|----------|-------|-----|----------|
| HDAC6 | 52  | 1.616525 | HDAC8 | 134 | -0.80427 |
| HDAC6 | 53  | 1.876927 | HDAC8 | 135 | -0.80006 |
| HDAC6 | 55  | 1.606951 | HDAC8 | 136 | -0.799   |
| HDAC6 | 57  | 1.542366 | HDAC8 | 143 | -0.7034  |
| HDAC6 | 58  | 2.227761 | HDAC8 | 145 | -0.69639 |
| HDAC6 | 59  | 1.982224 | HDAC8 | 146 | -0.69067 |
| HDAC6 | 60  | 1.566806 | HDAC8 | 147 | -0.67822 |
| HDAC6 | 66  | 1.897771 | HDAC8 | 148 | -0.67672 |
| HDAC6 | 67  | 1.919917 | HDAC8 | 149 | -0.66531 |
| HDAC6 | 68  | 1.847796 | HDAC8 | 151 | -0.65271 |
| HDAC6 | 70  | 1.804007 | HDAC8 | 152 | -0.63882 |
| HDAC6 | 72  | 1.943542 | HDAC8 | 154 | -0.62349 |
| HDAC6 | 73  | 2.093333 | HDAC8 | 156 | -0.61734 |
| HDAC6 | 76  | 1.897771 | HDAC8 | 157 | -0.61646 |
| HDAC6 | 81  | 1.876927 | HDAC8 | 163 | -0.57034 |
| HDAC6 | 82  | 1.996118 | HDAC8 | 165 | -0.55873 |
| HDAC6 | 83  | 1.887196 | HDAC8 | 167 | -0.5416  |
| HDAC6 | 84  | 2.075162 | HDAC8 | 168 | -0.5383  |
| HDAC6 | 87  | -1.75758 | HDAC8 | 169 | -0.51779 |
| HDAC6 | 88  | -1.25205 | HDAC8 | 170 | -0.51544 |
| HDAC6 | 89  | -1.06111 | HDAC8 | 171 | -0.491   |
| HDAC6 | 90  | -0.73653 | HDAC8 | 172 | -0.47942 |
| HDAC6 | 91  | -0.16003 | HDAC8 | 173 | -0.47415 |
| HDAC6 | 92  | -0.94192 | HDAC8 | 174 | -0.47415 |
| HDAC6 | 93  | -1.51204 | HDAC8 | 177 | -0.42742 |
| HDAC6 | 94  | -1.51204 | HDAC8 | 178 | -0.42438 |
| HDAC6 | 96  | -1.51204 | HDAC8 | 179 | -0.42131 |
| HDAC6 | 101 | -1.51204 | HDAC8 | 184 | -0.32853 |
| HDAC6 | 102 | -1.26223 | HDAC8 | 187 | -0.27645 |
| HDAC6 | 104 | 0.277359 | HDAC8 | 188 | -0.24546 |
| HDAC6 | 105 | -0.64296 | HDAC8 | 191 | -0.24036 |
| HDAC6 | 106 | -1.51204 | HDAC8 | 192 | -0.21647 |
| HDAC6 | 107 | -1.75758 | HDAC8 | 193 | -0.20332 |
| HDAC6 | 108 | -1.18746 | HDAC8 | 194 | -0.19379 |
| HDAC6 | 110 | -1.18746 | HDAC8 | 195 | -0.18789 |
| HDAC6 | 115 | -1.51204 | HDAC8 | 196 | -0.18188 |
| HDAC6 | 120 | -1.18746 | HDAC8 | 200 | -0.12627 |
| HDAC6 | 121 | -2.43662 | HDAC8 | 203 | -0.07694 |
| HDAC6 | 122 | -0.94192 | HDAC8 | 204 | -0.05812 |
| HDAC6 | 123 | -0.94192 | HDAC8 | 205 | -0.04722 |
| HDAC6 | 126 | -1.33109 | HDAC8 | 207 | -0.03825 |
| HDAC6 | 127 | -0.94192 | HDAC8 | 210 | 0.000079 |
| HDAC6 | 132 | 0.054684 | HDAC8 | 211 | 0.005176 |
| HDAC6 | 137 | 0.655626 | HDAC8 | 212 | 0.005176 |

---



---

|       |     |          |       |     |          |
|-------|-----|----------|-------|-----|----------|
| HDAC6 | 139 | -0.94192 | HDAC8 | 213 | 0.02633  |
| HDAC6 | 144 | 0.624803 | HDAC8 | 214 | 0.031822 |
| HDAC6 | 145 | 1.412105 | HDAC8 | 217 | 0.050575 |
| HDAC6 | 163 | 0.06976  | HDAC8 | 218 | 0.066693 |
| HDAC6 | 170 | 1.412105 | HDAC8 | 219 | 0.066693 |
| HDAC6 | 176 | 0.255884 | HDAC8 | 220 | 0.098628 |
| HDAC6 | 177 | 0.501421 | HDAC8 | 224 | 0.119269 |
| HDAC6 | 179 | -0.42285 | HDAC8 | 225 | 0.164552 |
| HDAC6 | 187 | -0.00793 | HDAC8 | 226 | 0.181031 |
| HDAC6 | 189 | -0.15353 | HDAC8 | 228 | 0.198314 |
| HDAC6 | 191 | -0.6511  | HDAC8 | 229 | 0.198314 |
| HDAC6 | 194 | 0.655626 | HDAC8 | 232 | 0.231722 |
| HDAC6 | 200 | -0.30793 | HDAC8 | 233 | 0.268612 |
| HDAC6 | 204 | -0.53864 | HDAC8 | 234 | 0.288606 |
| HDAC6 | 208 | -0.09286 | HDAC8 | 237 | 0.364806 |
| HDAC6 | 211 | -0.03825 | HDAC8 | 238 | 0.379266 |
| HDAC6 | 212 | 1.01397  | HDAC8 | 240 | 0.394343 |
| HDAC6 | 213 | -0.52705 | HDAC8 | 243 | 0.426568 |
| HDAC6 | 215 | -0.35677 | HDAC8 | 244 | 0.443851 |
| HDAC6 | 217 | -0.24546 | HDAC8 | 245 | 0.443851 |
| HDAC6 | 221 | -0.74896 | HDAC8 | 246 | 0.443851 |
| HDAC6 | 222 | 1.505044 | HDAC8 | 248 | 0.522896 |
| HDAC6 | 223 | 0.545758 | HDAC8 | 249 | 0.522896 |
| HDAC6 | 224 | 0.198314 | HDAC8 | 250 | 0.522896 |
| HDAC6 | 225 | 0.522896 | HDAC8 | 251 | 0.522896 |
| HDAC6 | 226 | 1.01397  | HDAC8 | 252 | 0.545758 |
| HDAC6 | 228 | 1.571048 | HDAC8 | 253 | 0.588367 |
| HDAC6 | 229 | 0.037401 | HDAC8 | 255 | 0.624803 |
| HDAC6 | 230 | 0.522896 | HDAC8 | 256 | 0.624803 |
| HDAC6 | 231 | -0.25544 | HDAC8 | 257 | 0.624803 |
| HDAC6 | 232 | 0.655626 | HDAC8 | 258 | 0.689388 |
| HDAC6 | 234 | 0.443851 | HDAC8 | 261 | 0.689388 |
| HDAC6 | 235 | -1.54581 | HDAC8 | 262 | 0.689388 |
| HDAC6 | 237 | 0.934925 | HDAC8 | 263 | 0.689388 |
| HDAC6 | 238 | 1.022938 | HDAC8 | 264 | 0.772889 |
| HDAC6 | 240 | 0.481173 | HDAC8 | 265 | 0.772889 |
| HDAC6 | 242 | -0.01416 | HDAC8 | 266 | 0.772889 |
| HDAC6 | 244 | 0.972247 | HDAC8 | 267 | 0.772889 |
| HDAC6 | 247 | 0.689388 | HDAC8 | 269 | 0.853057 |
| HDAC6 | 250 | 0.844721 | HDAC8 | 270 | 0.853057 |
| HDAC6 | 251 | 1.01397  | HDAC8 | 272 | 0.853057 |
| HDAC6 | 252 | -0.94192 | HDAC8 | 273 | 0.853057 |
| HDAC6 | 253 | 1.104262 | HDAC8 | 275 | 0.934925 |
| HDAC6 | 257 | 1.180461 | HDAC8 | 277 | 0.934925 |

---

---

|       |     |          |       |     |          |
|-------|-----|----------|-------|-----|----------|
| HDAC6 | 260 | 0.624803 | HDAC8 | 278 | 0.934925 |
| HDAC6 | 261 | 0.772889 | HDAC8 | 279 | 0.934925 |
| HDAC6 | 265 | 0.853057 | HDAC8 | 280 | 0.934925 |
| HDAC6 | 266 | 0.853057 | HDAC8 | 282 | 0.934925 |
| HDAC6 | 268 | 0.689388 | HDAC8 | 283 | 0.964461 |
| HDAC6 | 269 | 0.772889 | HDAC8 | 284 | 1.01397  |
| HDAC6 | 270 | 0.772889 | HDAC8 | 285 | 1.01397  |
| HDAC6 | 271 | 0.853057 | HDAC8 | 286 | 1.01397  |
| HDAC6 | 273 | 0.853057 | HDAC8 | 287 | 1.01397  |
| HDAC6 | 274 | 0.485131 | HDAC8 | 288 | 1.07154  |
| HDAC6 | 275 | 0.689388 | HDAC8 | 290 | 1.104262 |
| HDAC6 | 276 | 0.689388 | HDAC8 | 291 | 1.104262 |
| HDAC6 | 277 | 0.772889 | HDAC8 | 292 | 1.104262 |
| HDAC6 | 279 | 0.772889 | HDAC8 | 293 | 1.180461 |
| HDAC6 | 280 | 0.853057 | HDAC8 | 294 | 1.180461 |
| HDAC6 | 282 | 1.180461 | HDAC8 | 295 | 1.180461 |
| HDAC6 | 283 | -0.03916 | HDAC8 | 296 | 1.259507 |
| HDAC6 | 284 | 0.689388 | HDAC8 | 298 | 1.259507 |
| HDAC6 | 285 | 0.689388 | HDAC8 | 300 | 1.338552 |
| HDAC6 | 286 | 0.853057 | HDAC8 | 301 | 2.320699 |
| HDAC6 | 290 | 0.689388 |       |     |          |

---
