# Supplementary material for: Screening of selective histone deacetylase inhibitors by proteochemometric modeling
Source: Springer Nature journal article supplement (doi:10.1186/1471-2105-13-212), 2012-08-22
Supplement: 12859_2012_5563_MOESM2_ESM.pdf [file 12859_2012_5563_MOESM2_ESM.pdf]

**Table S2. Test set**

| HDAC  | Ligand | pIC50( $\mu$ M) | HDAC  | Ligand | pIC50( $\mu$ M) |
|-------|--------|-----------------|-------|--------|-----------------|
| HDAC2 | 3      | 0.89478         | HDAC6 | 321    | -0.64378        |
| HDAC2 | 7      | 1.005223        | HDAC6 | 325    | -0.65271        |
| HDAC2 | 8      | 0.972247        | HDAC6 | 330    | -0.66992        |
| HDAC2 | 10     | 1.694359        | HDAC6 | 334    | -0.69082        |
| HDAC2 | 11     | 2.256114        | HDAC6 | 337    | -0.62087        |
| HDAC2 | 12     | 2.320699        | HDAC6 | 340    | -0.61739        |
| HDAC2 | 14     | 0.89478         | HDAC6 | 345    | -0.57407        |
| HDAC2 | 15     | 0.907662        | HDAC6 | 348    | -0.56699        |
| HDAC2 | 17     | 0.964461        | HDAC6 | 354    | -0.56081        |
| HDAC2 | 24     | 1.505044        | HDAC6 | 360    | -0.51544        |
| HDAC2 | 28     | 1.051292        | HDAC6 | 361    | -0.51307        |
| HDAC2 | 30     | 1.093015        | HDAC6 | 362    | -0.49727        |
| HDAC2 | 33     | 1.127886        | HDAC6 | 363    | -0.491          |
| HDAC2 | 34     | 1.346953        | HDAC6 | 365    | -0.45925        |
| HDAC2 | 39     | 1.750581        | HDAC6 | 366    | -0.42438        |
| HDAC2 | 41     | 1.338552        | HDAC6 | 368    | -0.40717        |
| HDAC2 | 45     | 1.743566        | HDAC6 | 382    | -0.38909        |
| HDAC2 | 46     | 1.505044        | HDAC6 | 383    | -0.38655        |
| HDAC2 | 49     | 1.716818        | HDAC6 | 391    | -0.37678        |
| HDAC2 | 50     | 1.795864        | HDAC6 | 393    | -0.37181        |
| HDAC2 | 60     | 1.993295        | HDAC6 | 394    | -0.37181        |
| HDAC2 | 72     | 2.154208        | HDAC6 | 395    | -0.35177        |
| HDAC2 | 74     | 1.838594        | HDAC6 | 397    | -0.3461         |
| HDAC2 | 84     | 4.52213         | HDAC6 | 398    | -0.33448        |
| HDAC2 | 88     | 0.934925        | HDAC6 | 402    | -0.32652        |
| HDAC2 | 90     | 0.934925        | HDAC6 | 405    | -0.3245         |
| HDAC2 | 93     | 1.723318        | HDAC6 | 407    | -0.32247        |
| HDAC2 | 95     | 1.931533        | HDAC6 | 408    | -0.31627        |
| HDAC2 | 96     | 1.857242        | HDAC6 | 409    | -0.31838        |
| HDAC2 | 101    | 2.041401        | HDAC6 | 410    | -0.30366        |
| HDAC2 | 103    | 0.988351        | HDAC6 | 417    | -0.30151        |
| HDAC2 | 105    | 0.972685        | HDAC6 | 420    | -0.29276        |
| HDAC2 | 110    | 1.919917        | HDAC6 | 422    | -0.28151        |
| HDAC2 | 112    | 1.134047        | HDAC6 | 424    | -0.27575        |
| HDAC2 | 113    | 1.132806        | HDAC6 | 426    | -0.24546        |
| HDAC2 | 115    | 1.519504        | HDAC6 | 427    | -0.25544        |
| HDAC2 | 133    | 0.988351        | HDAC6 | 428    | -0.2699         |
| HDAC2 | 137    | 1.209998        | HDAC6 | 430    | -0.24546        |
| HDAC2 | 145    | 1.606951        | HDAC6 | 431    | -0.24546        |
| HDAC2 | 171    | 1.01397         | HDAC6 | 434    | -0.24546        |
| HDAC2 | 176    | 1.857242        | HDAC6 | 435    | -0.21647        |

---

|       |      |          |       |     |          |
|-------|------|----------|-------|-----|----------|
| HDAC2 | 208  | 1.153199 | HDAC6 | 436 | -0.24292 |
| HDAC2 | 220  | 2.399745 | HDAC6 | 444 | -0.19671 |
| HDAC2 | 222  | 1.542366 | HDAC6 | 448 | -0.19085 |
| HDAC2 | 225  | 1.061271 | HDAC6 | 451 | -0.19085 |
| HDAC2 | 226  | 1.412105 | HDAC6 | 461 | -0.19085 |
| HDAC2 | 237  | 1.127886 | HDAC6 | 465 | -0.16641 |
| HDAC2 | 301  | 2.093333 | HDAC6 | 466 | -0.17578 |
| HDAC2 | 303  | 2.010578 | HDAC6 | 472 | -0.14691 |
| HDAC2 | 321  | 1.082115 | HDAC6 | 474 | -0.14355 |
| HDAC2 | 344  | 0.934925 | HDAC6 | 481 | -0.12414 |
| HDAC2 | 360  | 1.723318 | HDAC6 | 482 | -0.13328 |
| HDAC2 | 432  | 2.320699 | HDAC6 | 483 | -0.13845 |
| HDAC2 | 686  | 1.01397  | HDAC6 | 494 | -0.11875 |
| HDAC2 | 698  | 1.03214  | HDAC6 | 497 | -0.11181 |
| HDAC2 | 801  | 1.298803 | HDAC6 | 499 | -0.08895 |
| HDAC2 | 1131 | 1.955972 | HDAC6 | 503 | -0.08895 |
| HDAC2 | 1132 | 1.990494 | HDAC6 | 507 | -0.08379 |
| HDAC2 | 1312 | 1.931533 | HDAC6 | 508 | -0.08499 |
| HDAC2 | 1397 | 0.914284 | HDAC6 | 512 | -0.08139 |
| HDAC2 | 1401 | 1.005223 | HDAC6 | 513 | -0.06451 |
| HDAC2 | 1409 | 1.051292 | HDAC6 | 514 | -0.06451 |
| HDAC2 | 1411 | 1.093015 | HDAC6 | 515 | -0.06451 |
| HDAC2 | 1414 | 1.115877 | HDAC6 | 523 | -0.05597 |
| HDAC2 | 1415 | 1.127886 | HDAC6 | 525 | -0.04554 |
| HDAC2 | 1418 | 1.127886 | HDAC6 | 526 | -0.04722 |
| HDAC2 | 1421 | 1.166568 | HDAC6 | 528 | -0.03825 |
| HDAC2 | 1423 | 1.194922 | HDAC6 | 530 | -0.02436 |
| HDAC2 | 1425 | 1.259507 | HDAC6 | 533 | -0.01479 |
| HDAC2 | 1428 | 1.259507 | HDAC6 | 536 | -0.01479 |
| HDAC2 | 1431 | 1.259507 | HDAC6 | 538 | -0.01479 |
| HDAC2 | 1434 | 1.220407 | HDAC6 | 539 | -0.00793 |
| HDAC2 | 1435 | 1.209998 | HDAC6 | 543 | -0.00694 |
| HDAC2 | 1436 | 1.361414 | HDAC6 | 549 | 0.020386 |
| HDAC2 | 1437 | 1.406697 | HDAC6 | 550 | 0.043069 |
| HDAC2 | 1439 | 1.505044 | HDAC6 | 553 | 0.043069 |
| HDAC4 | 3    | 0.443851 | HDAC6 | 554 | 0.049992 |
| HDAC4 | 5    | 0.501421 | HDAC6 | 559 | 0.098628 |
| HDAC4 | 7    | 0.491152 | HDAC6 | 561 | 0.105376 |
| HDAC4 | 8    | 0.493325 | HDAC6 | 562 | 0.106057 |
| HDAC4 | 10   | 0.545758 | HDAC6 | 565 | 0.112254 |
| HDAC4 | 14   | 0.447411 | HDAC6 | 569 | 0.112254 |
| HDAC4 | 45   | 0.624803 | HDAC6 | 570 | 0.119269 |
| HDAC4 | 64   | 0.853057 | HDAC6 | 575 | 0.14612  |
| HDAC4 | 81   | 0.87034  | HDAC6 | 577 | 0.148806 |

---

---

|       |     |          |       |     |          |
|-------|-----|----------|-------|-----|----------|
| HDAC4 | 84  | 0.876294 | HDAC6 | 579 | 0.189567 |
| HDAC4 | 93  | 0.483147 | HDAC6 | 581 | 0.189567 |
| HDAC4 | 124 | 0.522896 | HDAC6 | 582 | 0.193913 |
| HDAC4 | 176 | 0.630757 | HDAC6 | 584 | 0.249687 |
| HDAC4 | 244 | 0.772889 | HDAC6 | 585 | 0.225931 |
| HDAC4 | 287 | 0.853057 | HDAC6 | 587 | 0.266459 |
| HDAC4 | 301 | 0.876294 | HDAC6 | 588 | 0.261132 |
| HDAC4 | 302 | 0.624803 | HDAC6 | 594 | 0.288606 |
| HDAC4 | 303 | 0.522896 | HDAC6 | 596 | 0.288606 |
| HDAC4 | 305 | 0.514149 | HDAC6 | 599 | 0.300221 |
| HDAC4 | 310 | 0.689388 | HDAC6 | 600 | 0.28956  |
| HDAC4 | 313 | 0.672105 | HDAC6 | 602 | 0.31223  |
| HDAC4 | 315 | 0.772889 | HDAC6 | 603 | 0.324661 |
| HDAC4 | 323 | 0.462021 | HDAC6 | 605 | 0.324661 |
| HDAC4 | 346 | 0.689388 | HDAC6 | 606 | 0.324661 |
| HDAC4 | 348 | 0.772889 | HDAC6 | 608 | 0.350912 |
| HDAC4 | 363 | 0.730668 | HDAC6 | 611 | 0.350912 |
| HDAC4 | 377 | 0.682373 | HDAC6 | 613 | 0.364806 |
| HDAC4 | 381 | 0.772889 | HDAC6 | 616 | 0.392805 |
| HDAC4 | 383 | 0.593735 | HDAC6 | 618 | 0.418232 |
| HDAC4 | 389 | 0.591041 | HDAC6 | 619 | 0.416589 |
| HDAC4 | 390 | 0.655626 | HDAC6 | 620 | 0.426568 |
| HDAC4 | 416 | 0.772889 | HDAC7 | 3   | -0.8614  |
| HDAC4 | 440 | 0.815735 | HDAC7 | 4   | -0.85391 |
| HDAC4 | 441 | 0.772889 | HDAC7 | 7   | -0.81558 |
| HDAC4 | 443 | 0.81071  | HDAC7 | 8   | -0.83133 |
| HDAC4 | 444 | 0.681304 | HDAC7 | 10  | -0.79473 |
| HDAC4 | 445 | 0.815735 | HDAC7 | 13  | -0.7428  |
| HDAC4 | 449 | 0.791295 | HDAC7 | 24  | -0.83495 |
| HDAC4 | 450 | 0.81071  | HDAC7 | 36  | -0.75382 |
| HDAC4 | 455 | 0.665421 | HDAC7 | 45  | -0.77826 |
| HDAC4 | 456 | 0.76932  | HDAC7 | 106 | -0.8221  |
| HDAC4 | 459 | 0.841986 | HDAC7 | 121 | -0.79473 |
| HDAC4 | 465 | 0.689388 | HDAC7 | 244 | -0.76391 |
| HDAC4 | 479 | 0.624803 | HDAC7 | 302 | -0.80531 |
| HDAC4 | 481 | 0.859296 | HDAC7 | 303 | -0.80796 |
| HDAC4 | 490 | 0.772889 | HDAC7 | 304 | -0.81456 |
| HDAC4 | 498 | 0.87034  | HDAC7 | 309 | -0.74957 |
| HDAC4 | 502 | 0.689388 | HDAC7 | 310 | -0.74713 |
| HDAC4 | 506 | 0.815735 | HDAC8 | 1   | -4.09789 |
| HDAC4 | 507 | 0.853057 | HDAC8 | 7   | -1.18746 |
| HDAC4 | 520 | 0.853057 | HDAC8 | 8   | -0.94192 |
| HDAC4 | 521 | 0.759686 | HDAC8 | 9   | -0.94192 |
| HDAC4 | 523 | 0.853057 | HDAC8 | 11  | -0.91622 |

---

---

|       |     |          |       |     |          |
|-------|-----|----------|-------|-----|----------|
| HDAC4 | 546 | 0.772889 | HDAC8 | 14  | -3.12889 |
| HDAC4 | 548 | 0.742815 | HDAC8 | 15  | -3.08159 |
| HDAC4 | 562 | 0.772889 | HDAC8 | 21  | -1.90822 |
| HDAC4 | 581 | 0.826003 | HDAC8 | 29  | -1.75758 |
| HDAC4 | 586 | 0.853057 | HDAC8 | 30  | -1.61039 |
| HDAC4 | 604 | 0.873304 | HDAC8 | 41  | -1.11062 |
| HDAC4 | 612 | 0.87034  | HDAC8 | 45  | -1.18746 |
| HDAC4 | 623 | 0.479211 | HDAC8 | 47  | -1.75758 |
| HDAC4 | 626 | 0.481173 | HDAC8 | 53  | -0.94192 |
| HDAC4 | 628 | 0.481173 | HDAC8 | 55  | -1.2804  |
| HDAC4 | 642 | 0.624803 | HDAC8 | 61  | -1.30284 |
| HDAC4 | 643 | 0.624803 | HDAC8 | 63  | -1.35104 |
| HDAC4 | 644 | 0.655626 | HDAC8 | 64  | -0.94192 |
| HDAC4 | 645 | 0.646094 | HDAC8 | 83  | -1.33109 |
| HDAC4 | 647 | 0.689388 | HDAC8 | 86  | -2.18051 |
| HDAC4 | 651 | 0.722796 | HDAC8 | 88  | -2.28242 |
| HDAC6 | 7   | -0.20531 | HDAC8 | 89  | -2.38633 |
| HDAC6 | 12  | 0.198314 | HDAC8 | 90  | -2.39228 |
| HDAC6 | 16  | -0.58973 | HDAC8 | 91  | -3.05534 |
| HDAC6 | 19  | -0.59353 | HDAC8 | 92  | -2.13838 |
| HDAC6 | 20  | -0.5973  | HDAC8 | 98  | -2.03688 |
| HDAC6 | 31  | 0.177256 | HDAC8 | 99  | -1.98681 |
| HDAC6 | 38  | 0.148806 | HDAC8 | 101 | -1.96579 |
| HDAC6 | 39  | 0.119269 | HDAC8 | 102 | -1.79295 |
| HDAC6 | 45  | 0.098628 | HDAC8 | 106 | -1.75758 |
| HDAC6 | 47  | 0.337544 | HDAC8 | 107 | -1.75758 |
| HDAC6 | 48  | 0.394343 | HDAC8 | 109 | -1.75758 |
| HDAC6 | 56  | 0.374866 | HDAC8 | 112 | -1.7611  |
| HDAC6 | 61  | 0.379266 | HDAC8 | 119 | -1.75758 |
| HDAC6 | 62  | 0.443851 | HDAC8 | 120 | -1.75758 |
| HDAC6 | 63  | 0.364806 | HDAC8 | 121 | -1.75758 |
| HDAC6 | 64  | 0.386724 | HDAC8 | 122 | -1.75758 |
| HDAC6 | 65  | 0.371962 | HDAC8 | 124 | -1.75758 |
| HDAC6 | 69  | 0.426568 | HDAC8 | 125 | -1.75758 |
| HDAC6 | 71  | 0.426568 | HDAC8 | 130 | -1.75758 |
| HDAC6 | 74  | 0.410089 | HDAC8 | 133 | -1.75758 |
| HDAC6 | 75  | 0.443851 | HDAC8 | 137 | -1.75758 |
| HDAC6 | 77  | 0.414953 | HDAC8 | 138 | -1.75758 |
| HDAC6 | 78  | 0.443851 | HDAC8 | 139 | -1.7025  |
| HDAC6 | 85  | -0.62867 | HDAC8 | 140 | -1.68728 |
| HDAC6 | 86  | -0.63463 | HDAC8 | 141 | -1.59949 |
| HDAC6 | 95  | -0.61734 | HDAC8 | 142 | -1.51613 |
| HDAC6 | 103 | -0.60103 | HDAC8 | 144 | -1.51204 |
| HDAC6 | 109 | -0.58198 | HDAC8 | 150 | -1.51204 |

---

---

|       |     |          |       |     |          |
|-------|-----|----------|-------|-----|----------|
| HDAC6 | 116 | -0.63463 | HDAC8 | 153 | -1.51204 |
| HDAC6 | 131 | -0.51544 | HDAC8 | 155 | -1.51204 |
| HDAC6 | 133 | -0.38909 | HDAC8 | 158 | -1.51204 |
| HDAC6 | 135 | -0.51544 | HDAC8 | 159 | -1.51204 |
| HDAC6 | 146 | -0.52648 | HDAC8 | 160 | -1.45993 |
| HDAC6 | 171 | -0.45085 | HDAC8 | 161 | -1.45447 |
| HDAC6 | 173 | -0.40557 | HDAC8 | 162 | -1.42221 |
| HDAC6 | 181 | -0.5492  | HDAC8 | 164 | -1.37229 |
| HDAC6 | 188 | -0.55347 | HDAC8 | 166 | -1.37124 |
| HDAC6 | 193 | -0.21647 | HDAC8 | 175 | -1.33109 |
| HDAC6 | 195 | -0.08776 | HDAC8 | 176 | -1.33109 |
| HDAC6 | 197 | 0.288606 | HDAC8 | 180 | -1.33109 |
| HDAC6 | 203 | -0.48846 | HDAC8 | 181 | -1.33109 |
| HDAC6 | 205 | -0.19484 | HDAC8 | 182 | -1.33109 |
| HDAC6 | 206 | -0.31424 | HDAC8 | 183 | -1.33109 |
| HDAC6 | 207 | -0.45092 | HDAC8 | 185 | -1.30155 |
| HDAC6 | 209 | 0.364806 | HDAC8 | 186 | -1.18746 |
| HDAC6 | 210 | -0.62609 | HDAC8 | 189 | -1.18746 |
| HDAC6 | 214 | 0.360114 | HDAC8 | 190 | -1.18746 |
| HDAC6 | 218 | -0.36825 | HDAC8 | 197 | -1.18746 |
| HDAC6 | 220 | -0.491   | HDAC8 | 198 | -1.16929 |
| HDAC6 | 241 | 0.098628 | HDAC8 | 199 | -1.08555 |
| HDAC6 | 243 | -0.05424 | HDAC8 | 202 | -1.03213 |
| HDAC6 | 245 | 0.031822 | HDAC8 | 206 | -0.98834 |
| HDAC6 | 246 | 0.106741 | HDAC8 | 208 | -0.97569 |
| HDAC6 | 248 | 0.141942 | HDAC8 | 209 | -0.97569 |
| HDAC6 | 249 | 0.126425 | HDAC8 | 215 | -0.96089 |
| HDAC6 | 254 | 0.126425 | HDAC8 | 216 | -0.94894 |
| HDAC6 | 255 | 0.124982 | HDAC8 | 221 | -0.94192 |
| HDAC6 | 256 | 0.119269 | HDAC8 | 222 | -0.94192 |
| HDAC6 | 258 | -0.18493 | HDAC8 | 223 | -0.94192 |
| HDAC6 | 259 | 0.066693 | HDAC8 | 227 | -0.94192 |
| HDAC6 | 262 | 0.119269 | HDAC8 | 230 | -0.94192 |
| HDAC6 | 263 | 0.267534 | HDAC8 | 231 | -0.94192 |
| HDAC6 | 264 | 0.054684 | HDAC8 | 235 | -0.94192 |
| HDAC6 | 272 | 0.176839 | HDAC8 | 236 | -0.94192 |
| HDAC6 | 278 | 0.119269 | HDAC8 | 239 | -0.94192 |
| HDAC6 | 281 | 0.189567 | HDAC8 | 241 | -0.94192 |
| HDAC6 | 287 | 0.350912 | HDAC8 | 242 | -0.94192 |
| HDAC6 | 288 | 0.307377 | HDAC8 | 247 | -0.94192 |
| HDAC6 | 291 | 0.119269 | HDAC8 | 254 | -0.94192 |
| HDAC6 | 292 | 0.166166 | HDAC8 | 259 | -0.94192 |
| HDAC6 | 293 | 0.119269 | HDAC8 | 260 | -0.94192 |
| HDAC6 | 296 | 0.158169 | HDAC8 | 268 | -0.94192 |

---

---

|       |     |          |       |     |          |
|-------|-----|----------|-------|-----|----------|
| HDAC6 | 299 | 0.156591 | HDAC8 | 271 | -0.94192 |
| HDAC6 | 301 | 0.356405 | HDAC8 | 274 | -0.94192 |
| HDAC6 | 316 | -0.73463 | HDAC8 | 276 | -0.92001 |
| HDAC6 | 317 | -0.73015 | HDAC8 | 281 | -0.92746 |
| HDAC6 | 318 | -0.72102 | HDAC8 | 289 | -0.92001 |
| HDAC6 | 319 | -0.69639 | HDAC8 | 297 | -0.89086 |
| HDAC6 | 320 | -0.69639 | HDAC8 | 299 | -0.86288 |

---
