# Supplementary material for: Screening of selective histone deacetylase inhibitors by proteochemometric modeling
Source: Springer Nature journal article supplement (doi:10.1186/1471-2105-13-212), 2012-08-22
Supplement: 12859_2012_5563_MOESM3_ESM.pdf [file 12859_2012_5563_MOESM3_ESM.pdf]

**Table S3 Protein Geometry descriptors**

|       | C-N-CA | C-N-CA(G) | C-N-CA(P) | CA-C-N | CA-C-N(G) | CA-C-N(P) | CA-C-O | CA-C-O(G) | CB-CA-C | CB-CA-C(A) |
|-------|--------|-----------|-----------|--------|-----------|-----------|--------|-----------|---------|------------|
| HDAC2 | 121.65 | 121.67    | 120.71    | 116.67 | 116.68    | 116.73    | 120.38 | 120.39    | 110.20  | 110.54     |
| HDAC4 | 122.19 | 122.09    | 121.41    | 116.59 | 116.59    | 116.81    | 120.35 | 120.40    | 110.09  | 110.34     |
| HDAC6 | 121.67 | 121.87    | 120.18    | 116.47 | 116.70    | 116.68    | 120.34 | 120.46    | 110.36  | 110.68     |
| HDAC7 | 121.85 | 121.40    | 121.50    | 116.55 | 116.74    | 117.28    | 120.40 | 120.47    | 110.43  | 110.55     |
| HDAC8 | 122.23 | 122.13    | 121.78    | 116.43 | 116.24    | 116.56    | 120.41 | 120.42    | 110.46  | 110.52     |

**Table S3 (continued)**

|       | CB-CA-C<br>(I,T,V) | N-CA-C | N-CA-C<br>(G) | N-CA-C<br>(P) | N-CA-CB | N-CA-CB<br>(A) | N-CA-CB<br>(I,T,V) | N-CA-CB<br>(P) | O-C-N  | O-C-N<br>(P) |
|-------|--------------------|--------|---------------|---------------|---------|----------------|--------------------|----------------|--------|--------------|
| HDAC2 | 110.62             | 111.30 | 112.97        | 112.17        | 110.70  | 110.91         | 111.70             | 103.20         | 122.91 | 123.15       |
| HDAC4 | 109.92             | 111.42 | 113.56        | 113.48        | 110.54  | 110.57         | 111.67             | 103.25         | 123.01 | 123.39       |
| HDAC6 | 110.73             | 111.70 | 113.84        | 113.61        | 110.86  | 110.43         | 112.22             | 103.33         | 123.12 | 123.21       |
| HDAC7 | 110.83             | 111.48 | 113.42        | 113.32        | 110.71  | 110.40         | 112.09             | 103.16         | 122.96 | 122.87       |
| HDAC8 | 110.79             | 111.43 | 113.01        | 112.63        | 110.65  | 110.55         | 111.45             | 103.34         | 123.13 | 123.66       |

**Table S3 (continued)**

|       | Chi1 g(+) | Chi1 g(-) | Chi1 trans | Omega  | Phi    | Phi helix | Phi(P) | Psi   | Psi helix | Psi(G) |
|-------|-----------|-----------|------------|--------|--------|-----------|--------|-------|-----------|--------|
| HDAC2 | -65.77    | 56.29     | 182.91     | 179.28 | -76.25 | -64.07    | -71.37 | 85.02 | -38.10    | 28.12  |
| HDAC4 | -64.92    | 52.52     | 183.40     | 180.22 | -79.18 | -61.03    | -65.83 | 80.73 | -36.27    | 8.74   |
| HDAC6 | -63.51    | 55.77     | 182.95     | 179.23 | -75.12 | -70.89    | -69.64 | 73.57 | -33.24    | -21.09 |
| HDAC7 | -65.86    | 55.78     | 182.78     | 179.14 | -74.80 | -60.81    | -69.90 | 80.70 | -37.93    | 21.27  |
| HDAC8 | -66.64    | 51.01     | 185.75     | 179.07 | -76.79 | -62.42    | -69.48 | 78.32 | -40.28    | 20.39  |
