# Supplementary material for: Screening of selective histone deacetylase inhibitors by proteochemometric modeling
Source: Springer Nature journal article supplement (doi:10.1186/1471-2105-13-212), 2012-08-22

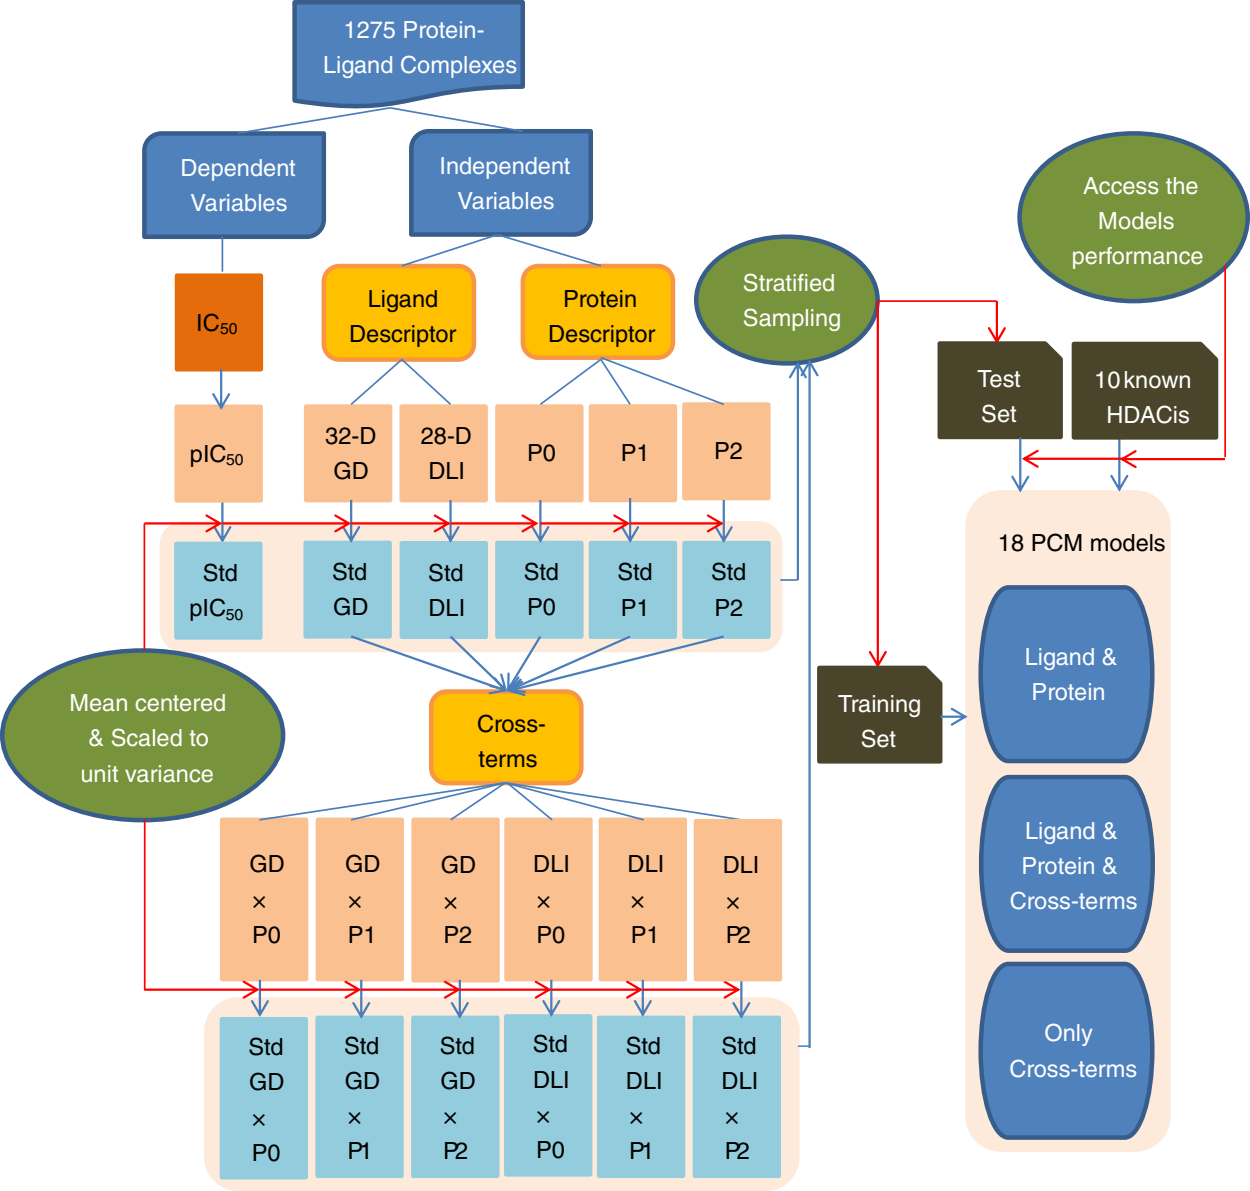

Supplement: 12859_2012_5563_MOESM5_ESM.pdf [file 12859_2012_5563_MOESM5_ESM.pdf]
